# Supplementary material for: Electrocatalytic oxidation of N-acetyl-l-cysteine at a quercetin multiwall carbon nanotube modified GCE: application for simultaneous determination of ascorbic acid, l-DOPA, N-acetyl-l-cysteine, acetaminophen and tryptophan
Source: Royal Society of Chemistry journal article supplement (doi:10.1039/c5ay00889a), 2015-01-01
Supplement: c5ay00889a1.pdf [file c5ay00889a1.pdf]

**Electrocatalytic oxidation of N-acetyl-L-cysteine at quercetin multiwall carbon nanotubes modified GCE: Application for simultaneous determination of ascorbic acid, L-DOPA, N-acetyl-L-cysteine, acetaminophen and tryptophan**

Hamid R. Zare,\* Marjan Haji-Dehabadi, Zahra Shekari

*Department of Chemistry, Yazd University, Yazd, 89195-741, Iran*

*Fax number: +98 353 8210991    Telephon number: +98 353 1232669*

*E-mail address: [hrzare@yazd.ac.ir](mailto:hrzare@yazd.ac.ir)*

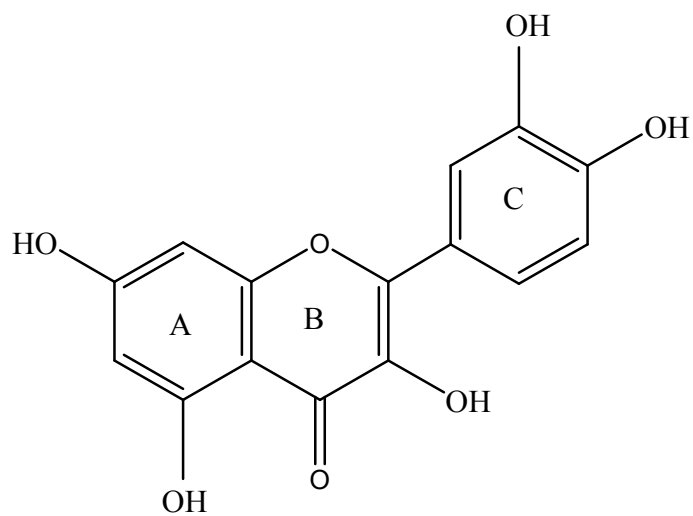

**Scheme S1.** The molecular structure of quercetin.

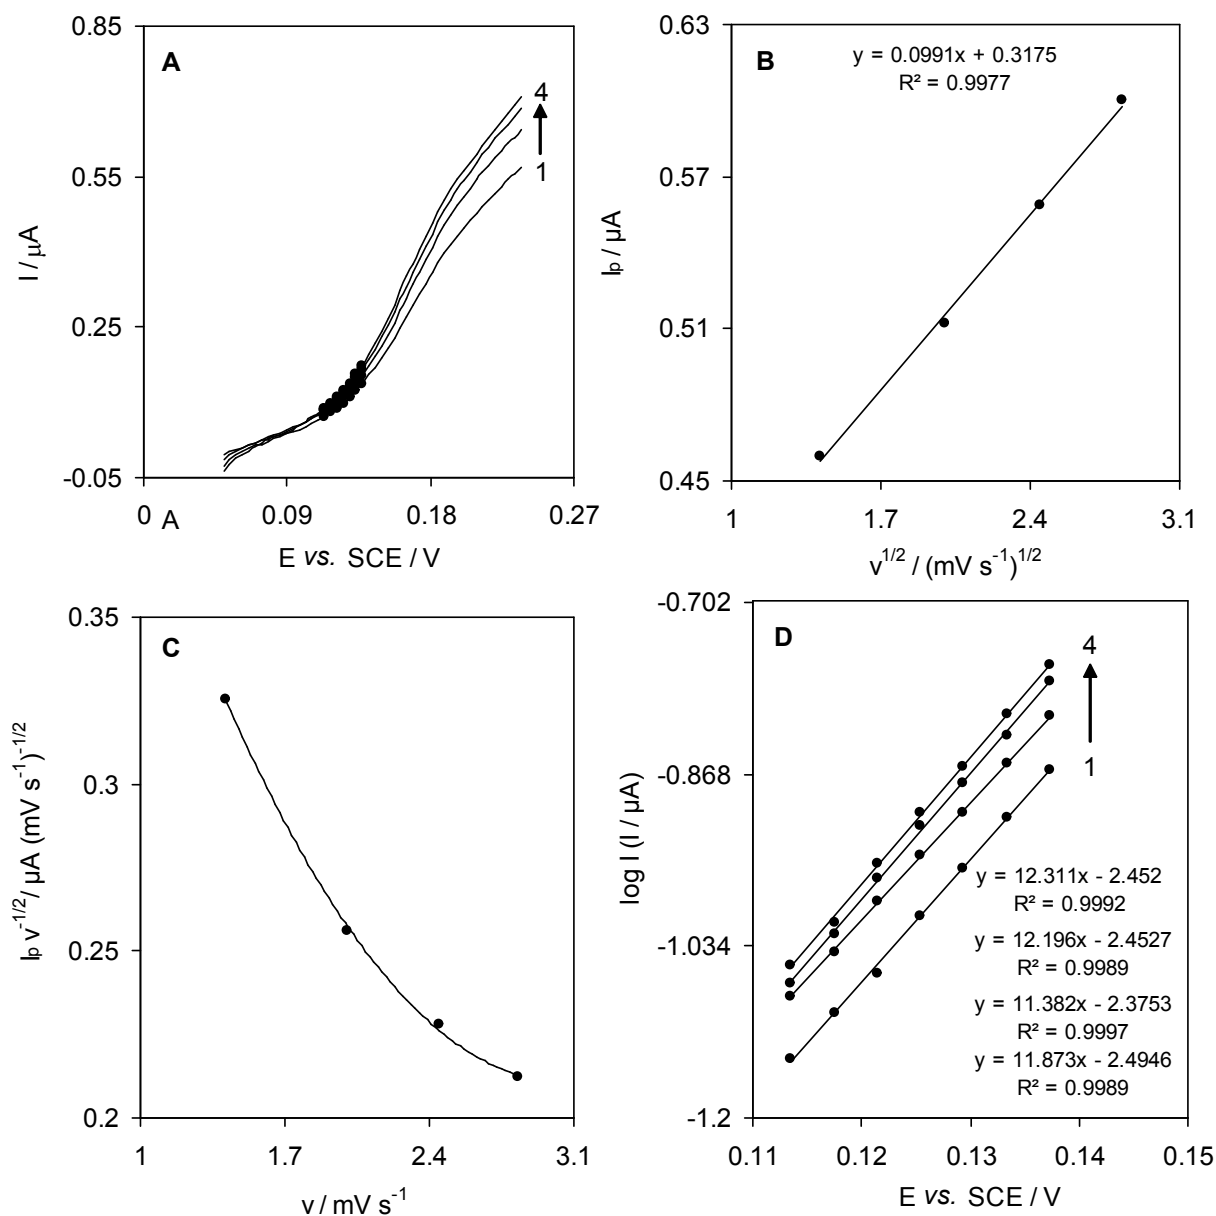

**Fig. S1.** (A) Linear sweep voltammograms of Q-MWCNT-GCE in a 0.10 M phosphate buffer solution (pH 7.0) containing 0.20 mM NAC at different potential scan rates. Numbers of 1–4 correspond to 2, 4, 6 and 8  $\text{mV s}^{-1}$ , respectively. (B) Variation of the electrocatalytic peak current vs. the square root of the potential scan rate. (C) Variation of the sweep rate normalized peak current ( $I_p v^{-1/2}$ ) vs. the potential scan rate. (D) Tafel plots drawn from the linear sweep voltammograms of (A). Equations from bottom to top correspond to plots of 1–4, respectively.

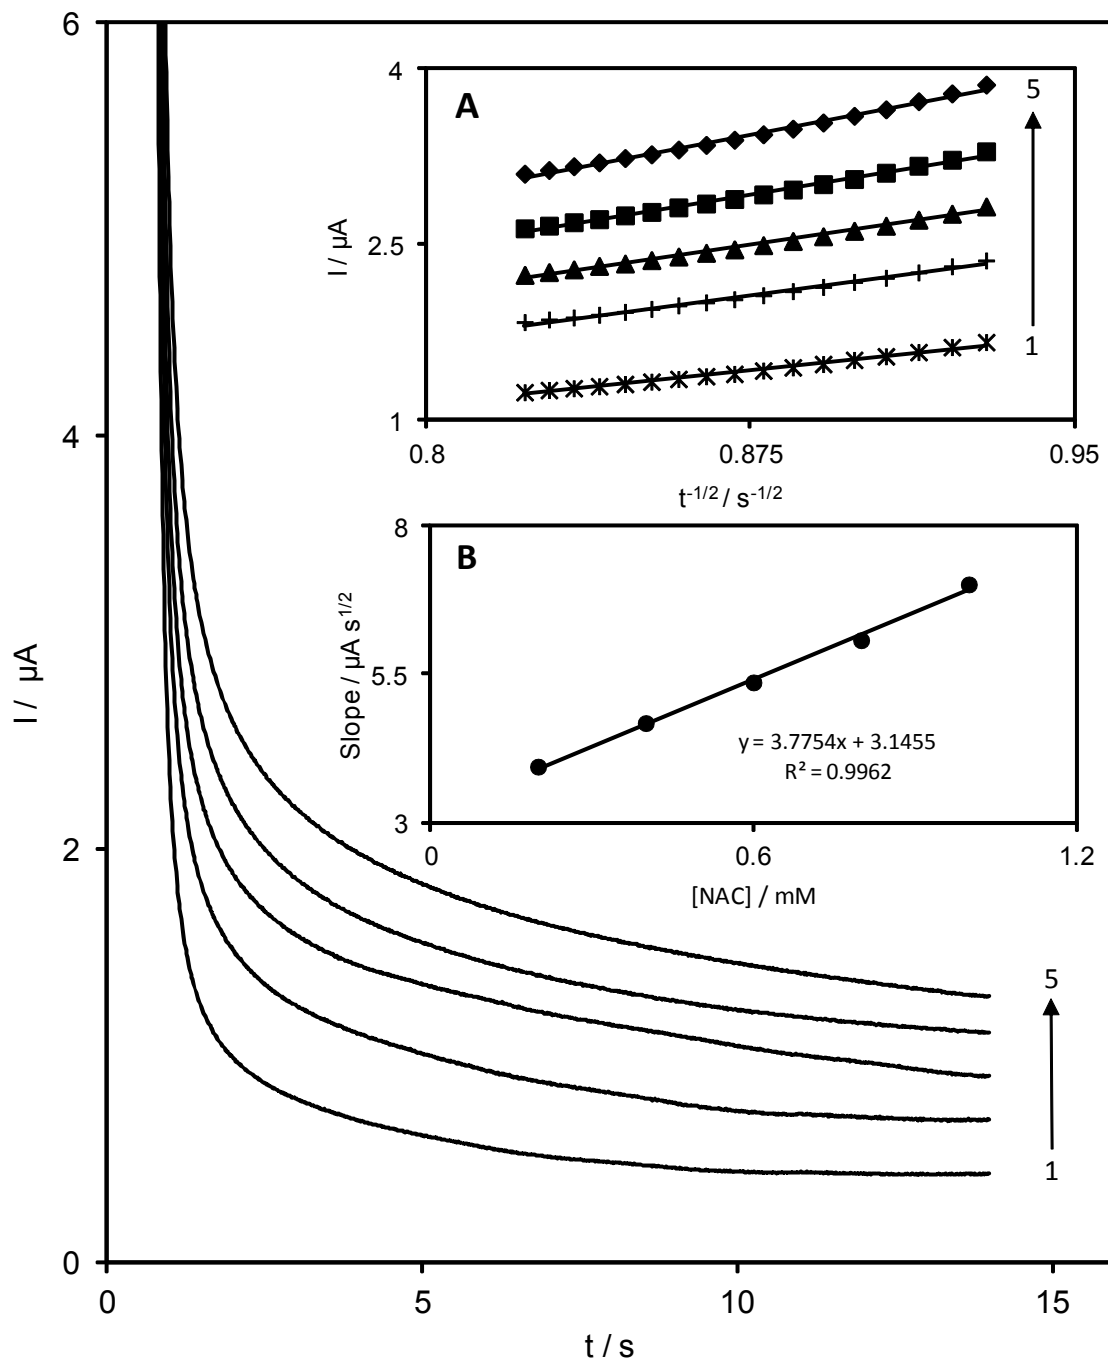

**Fig. S2.** Chronoamperometric responses of Q-MWCNT-GCE in a 0.10 M phosphate buffer solution (pH 7.0) at a potential step 250 mV for different concentrations of NAC. Numbers of 1–5 correspond to 0.2–1.0 mM NAC. Insets: (A) plots of  $I$  vs.  $t^{-1/2}$  obtained from chronoamperograms. (B) Plot of the slope of straight lines against the NAC concentrations.

**Table S1.** Comparison of the analytical parameters of several modified electrodes for NAC electrocatalytic determination

| Modified electrode <sup>a</sup>           | Method      | Linear range (μM)       | Detection limit(μM) | References |
|-------------------------------------------|-------------|-------------------------|---------------------|------------|
| AC/RuON/GCE                               | DPV         | 0.3–14.0<br>14.0–1000.0 | 2.84                | [1]        |
| PB/Pd–Al                                  | Amperometry | 2.0–40.0                | 0.54                | [15]       |
| CuHCF/CPE                                 | DPV         | 120.0–830.0             | 63.0                | [40]       |
| Catechol/CPE                              | CV          | 80.0–1000.0             | 60.0                | [41]       |
| Nq/NG/PDC/GCE                             | DPV         | 4.0–130.0               | 0.80                | [42]       |
| Edge plane pyrolytic graphite electrode   | CV          | 5.0–110.0               | 1.70                | [43]       |
| Fe(II)NP/CPE                              | Amperometry | 960.0–14.000            | 150.0               | [44]       |
| Fe <sub>2</sub> O <sub>3</sub> @CoHCF/CPE | Amperometry | 20.0–432.0              | 0.0209              | [45]       |
| Cobalt salophen complexes/CPE             | DPV         | 0.10–100.0              | 0.05                | [46]       |
| <i>N</i> -DHPB/MWCNT/CPE                  | DPV         | 0.50–200.0              | 0.20                | [47]       |
| CoNPs–CNFs/GCE                            | Amperometry | 0.12–13.3               | 25.0                | [48]       |
| Q–MWCNT–GCE                               | DPV         | 1.1–50.0<br>50.0–1000.0 | 0.44                | This work  |

<sup>a</sup>AC–RuON–GCE: Acetaminophene at the surface of a ruthenium oxide nanoparticles–glassy carbon electrode; PB/Pd–Al: Palladized aluminum electrode modified by prussian blue film; CuHCF/CPE: Carbon paste electrode modified with copper (II) hexacyanoferrate (III); Catechol/CPE: Carbon paste electrode modified with catechol; Nq/NG/PDC/GCE: Nanocomposite containing naphthoquinone and nanogold supported on poly (2,6–pyridinedicarboxylic acid) film modified glassy carbon electrode; Fe(II)NP/CPE: Iron nitroprusside modified graphite paste electrode; Cobalt salophen complexes/CPE: Carbon nanotube–paste electrode modified with salophen complexes of cobalt(III) perchlorate; Fe<sub>2</sub>O<sub>3</sub>@CoHCF/CPE: Nanoparticles of iron (III) oxide core–cobalt hexacyanoferrate shell (Fe<sub>2</sub>O<sub>3</sub>@CoHCF)–modified carbon paste electrode; *N*-DHPB/MWCNT/CPE: *N*–(3,4–dihydroxyphenethyl)–3,5–dinitrobenzamide modified multiwall carbon nanotubes paste electrode; CoNPs–CNFs/GCE: Carbon nanofibers (CNFs) decorated with cobalt nanoparticles (CoNPs)–glassy carbon electrode; Q–MWCNT–GCE: Quercetin modified multiwall carbon nanotubes–glassy carbon electrode.
